# Supplementary material for: Perinatal risk factors for type 1 diabetes revisited: a population-based register study
Source: Springer Nature journal article supplement (doi:10.1007/s00125-019-4874-5), 2019-04-30
Supplement: MOESM1 [file 16687710]

## Electronic supplementary material (ESM)

ESM Table 1. Codes according to the World Health Organization (WHO) International Classification of Diseases (ICD) (23). The study period covered three editions, ICD 8 (until 1986), ICD 9 (1987-1996) and ICD 10 (from 1997). For phototherapy, different national codes were used until 1996, from 1997-2006 and from 2007 and onwards.

|                                                                            | ICD 8                                | ICD 9                   | ICD 10                        |
|----------------------------------------------------------------------------|--------------------------------------|-------------------------|-------------------------------|
| Pre-eclampsia                                                              | 63703, 63704, 63709                  | 642E-F,H                | O14                           |
| Eclampsia                                                                  | 63710, 63799                         | 642 G                   | O15                           |
| Hypertension                                                               | 63701                                | 642, 642A-D             | O10                           |
| <i>Maternal infections</i>                                                 |                                      |                         |                               |
| Urinary tract                                                              | 635                                  | 646G, 599A              | O23, N109, N39, N30           |
| Premature rupture of membranes                                             | 63495, 661 01-99                     | 658B-C, 658E            | O420-429                      |
| Pyrexia and other infections during labour                                 | 67299                                | 659C-D                  | O752-753                      |
| <i>Immunizations and jaundice</i>                                          |                                      |                         |                               |
| Rh                                                                         | 77400, 77500                         | 773A                    | P550                          |
| AB0                                                                        | 77410, 77510                         | 773B                    | P551                          |
| Jaundice                                                                   | 77400-77499, 77500,77599 77893,77896 | 773A-F, 774A-G          | P550-599                      |
| <i>Neonatal asphyxia and infections</i>                                    |                                      |                         |                               |
| Intrauterine asphyxia, birth asphyxia and respiratory distress of new-born | 77610, 77640, 77650, 77629           | 768C-G, 768X, 769 A-B,X | P200-209, P210-219, P220 –229 |
| Congenital pneumonia due to virus                                          | 4860-69                              | 770A                    | P230-239                      |
| Neonatal aspiration syndromes                                              | 48501,77600                          | 770B                    | P240-249                      |
| Bacterial sepsis of new-born                                               | 03800-03899, 03990                   | 771, 771A-Z             | P360-P369                     |
|                                                                            | Years                                |                         |                               |
|                                                                            | 1963-1996                            | 1997-2006               | 2007-                         |
| Phototherapy                                                               | 9391                                 | V9391                   | DQ015                         |

ESM Table 2. Mothers' birth countries in the study population.

| Mother's country of birth | Cases  | Controls |
|---------------------------|--------|----------|
| Sweden                    | 14 323 | 53 499   |
| Finland                   | 482    | 1 683    |
| Norway                    | 72     | 294      |
| Denmark                   | 70     | 207      |
| Iceland                   | 2      | 29       |
| Total                     | 14 949 | 55 712   |

ESM Table 3. Report of missing data.

| Variable             | Number of participating individuals<br>(missing) |                |
|----------------------|--------------------------------------------------|----------------|
|                      | Cases                                            | Controls       |
| Caesarean section    | 14 948 (<0.1%)                                   | 55 707 (<0.1%) |
| Birth weight         | 14 916 (0.2%)                                    | 55 543 (0.3%)  |
| Gestational length   | 14 921 (0.2%)                                    | 55 610 (0.2%)  |
| Age of mother        | 14 948 (<0.1%)                                   | 55 707 (<0.1%) |
| Birth weight z score | 14 889 (0.4%)                                    | 55 453 (0.5%)  |
|                      | Subgroup analyses (c.f. Table 7)                 |                |
|                      | Cases                                            | Controls       |
| BMI                  | 6 171 (14.2%)                                    | 22 677 (14.6%) |
| Caesarean section    | 7 196 (0%)                                       | 26 579 (0%)    |
| Gestational length   | 7 192 (<0.1%)                                    | 26 557 (<0.1%) |
| Age of mother        | 7 196 (0%)                                       | 26 579 (0%)    |
| Birth weight z score | 7 176 (0.3%)                                     | 26 482 (0.4%)  |

ESM Table 4. Odds ratios (OR) and 95% confidence intervals (CI) of Figure 1.

| Z score category | Cases | Controls | OR (95% CI)       |
|------------------|-------|----------|-------------------|
| <-3              | 41    | 230      | 0.64 (0.46, 0.90) |
| -3 to -2         | 295   | 1 343    | 0.79 (0.70, 0.91) |
| -2 to -1         | 1 854 | 7 898    | 0.86 (0.81, 0.92) |
| -1 to 0          | 5 018 | 19 143   | 0.96 (0.92, 1.00) |
| 0 to 1           | 4 909 | 17 918   | -                 |
| 1 to 2           | 7 008 | 2 176    | 1.13 (1.07, 1.20) |
| 2 to 3           | 1 585 | 480      | 1.11 (0.99, 1.24) |
| >3               | 328   | 116      | 1.30 (1.04, 1.62) |
